1 **Improving water quality does not guarantee fish health: effects of ammonia**  
2 **pollution on the behaviour of wild-caught pre-exposed fish.**

3

4 **Short title: Improving water quality does not guarantee fish health**

5

6 Patricia Soler<sup>1</sup>, Melissa Faria<sup>2</sup>, Carlos Barata<sup>2</sup>, Eduardo García-Galea<sup>1</sup>, Beatriz  
7 Lorente<sup>1</sup>, Dolors Vinyoles<sup>1\*</sup>

8

9 <sup>1</sup>Department of Evolutionary Biology, Ecology and Environmental Sciences, University  
10 of Barcelona, Barcelona, Spain

11 <sup>2</sup>Department of Environmental Chemistry, IDAEA- CSIC, Barcelona, Spain

12

13 \*Corresponding autor:

14 E-mail: [d.vinyoles@ub.edu](mailto:d.vinyoles@ub.edu) (DV)

15

16 **Abstract**

17 Ammonia is a pollutant frequently found in aquatic ecosystems. In fish, ammonia  
18 can cause physical damage, alter its behaviour and even cause death. Exposure to  
19 ammonia also increases fish physiological stress, which can be measured through  
20 biomarkers. In this study, we analysed the effect of sublethal ammonia concentrations  
21 on the behaviour and the oxidative stress of *Barbus meridionalis* that had been pre-  
22 exposed to this compound in the wild. Wild-caught fish from a polluted site (pre-  
23 exposed fish) and from an unpolluted site (non-pre-exposed fish) were exposed, under  
24 experimental conditions, to total ammonia concentrations (TAN) of 0, 1, 5 and 8 mg/L.

25 Swimming activity, feeding behaviour and oxidative stress response based on  
26 biomarkers were analysed. Pre-exposed fish showed both an altered behaviour and an  
27 altered oxidative stress response in the control treatment (0 mg/L). Differences in  
28 swimming activity were also found as pre-exposed fish swam less. Lower feeding  
29 activity (voracity and satiety) and altered response to oxidative stress were also  
30 observed at  $\geq 1$  mg/L TAN. Biomarker results confirmed pre-exposed fish suffer from a  
31 reduction in their antioxidant defences and, hence, showed increased oxidative tissue  
32 damage. In summary, pre-exposed fish showed more sensitivity to ammonia exposure  
33 than fish from a pristine site.

34

## 35 **Introduction**

36 Ammonia is a commonly found pollutant in aquatic environments around the world  
37 [1, 2]. This compound can be found naturally, but there is also an additional  
38 contribution from sewage effluents, industrial waste and agricultural run-off [1]. The  
39 presence of ammonia in freshwater has been associated with the acidification of rivers  
40 and lakes, eutrophication and direct toxicity to aquatic organisms [1 – 3]. The toxicity of  
41 this compound on aquatic organisms will depend on the chemical form of ammonia, pH  
42 and temperature [4]. Furthermore, it will depend on the time of exposure [4]. This  
43 compound damages the gills, liver, kidney, spleen and other organ's tissues of fish,  
44 therefore causing breathing difficulties [5, 6]. This may lead to physiological alterations  
45 and, eventually, exhaustion or death [6]. Ammonia can cause cell damage and can also  
46 affect the antioxidant defence system thus altering the levels of oxidative stress in fish  
47 [7, 8]. Ammonia can also alter fish behaviour. Fish exposure to sub-lethal  
48 concentrations of ammonia can reduce swimming activity [9], foraging behaviour [10]  
49 and the ability to flee from predators [10, 11].

50 Behavioural analyses are commonly used in ecotoxicology as indicators of sub-  
51 lethal toxicity in aquatic animals, and an increasing body of evidence has demonstrated  
52 the effectiveness of this approach in a wide range of exposure scenarios [12, 13]. Fish  
53 exposed to increased ammonia concentrations experience difficulty in eliminating this  
54 metabolite from the body [8] and, therefore, prolonged exposures to ammonia promotes  
55 its accumulation in fish [11]. Several studies indicated that fish pre-exposed to episodes  
56 of pollution by inorganic nitrogen compounds [14, 15] and heavy metals [16 – 18]  
57 could be more tolerant to these pollutants by acclimation. In these studies, it was shown  
58 that fish pre-exposed to sub-lethal concentrations of a pollutant exhibited an increased  
59 tolerance to exposure to high concentrations of the same pollutant. Fish pre-exposed to  
60 sub-lethal concentrations of ammonia pollution could tolerate high concentrations of  
61 this compound by increasing the ammonia excretion rate as well as by favouring the  
62 evolution of adaptive mechanisms [14, 15]. These mechanisms have also been shown to  
63 work with other types of stressors such as hypoxia [19], salinity [20] and temperature  
64 changes [21]. All these studies analyse the effect of fish pre-exposure from a  
65 biochemical and physiological point of view.

66 The aim of this study was to analyse, under experimental conditions, the effect of  
67 sublethal ammonia concentrations on the swimming activity and feeding behaviour of  
68 wild-caught fish that had been pre-exposed for a long time to this compound. The  
69 species selected for this study was the Mediterranean barbel, *Barbus meridionalis*  
70 (Risso 1827), a freshwater fish endemic to the NE Spain and SE France. Fish from a  
71 long-term polluted river and fish from a pristine stream were exposed to sublethal  
72 ammonia concentrations in the laboratory. Fish stress responses were complemented  
73 using biomarkers. The analysis of biomarkers may provide valuable information by  
74 assessing the activity of enzymes/markers involved in energy metabolism,

75 detoxification, antioxidant defences and oxidative stress. In this study, biomarkers  
76 included lactate dehydrogenase (LDH), which is involved in anaerobic metabolism [22];  
77 glutathione *S*-transferase, a xenobiotic that metabolizes II enzyme response [23];  
78 glutathione (GSH) levels, which aid maintenance of the cell redox equilibrium as well  
79 as being a powerful antioxidant [24]; catalase (CAT EC 1.11.1.6—reduces H<sub>2</sub>O<sub>2</sub> to  
80 water) an antioxidant enzyme involved in detoxifying reactive oxygen species and  
81 markers of oxidative tissue damage such as lipid peroxidation [25]. It has been  
82 suggested that *B. meridionalis* is relatively tolerant to organic pollution [26] and,  
83 globally speaking, more tolerant to pollution than other cyprinid species [26 – 28]. It  
84 was hypothesized that fish previously exposed to ammonia in the wild should have a  
85 higher tolerance to this compound than fish coming from unpolluted waters.

86

## 87 **Materials and Methods**

### 88 **Study area and fish sampling**

89 Two sites (polluted and unpolluted) were sampled in the Besòs River basin (NE  
90 Spain) (Fig 1). In both sites there was prior knowledge about the existence of a  
91 population of *B. meridionalis* [29, 30]. The polluted site was located in the Congost  
92 River, a 43 Km long tributary in the Besòs basin, 50 m downstream the Granollers  
93 WWTP (41°56'97.31"N, 2°27'15.66"E). The unpolluted site was located in the Castelló  
94 stream, a pristine 3 Km long tributary inside the San Llorenç del Munt i l'Obac Natural  
95 Park (41°65'16.97"N, 2°06'11.18"E). The concentration of total ammonia nitrogen  
96 (TAN) in the polluted site (Congost River) ranged from 0.54 mg/L to 24.70 mg/L  
97 between 2011 to 2015 (Table 1) (data provided for Granollers Town Council). In the  
98 unpolluted site (Castelló stream), the concentration of TAN ranged from 0.00 mg/L to  
99 0.02 mg/L during the same period (Table 1) [31]. In this stream, there is no urban

100 nucleus or any type of agricultural or industrial activity. Although ammonia is not the  
 101 only pollutant present at these two sites, it is one of the most frequently found, not only  
 102 in this river but in all rivers of NE Spain [2]. Table 1 shows the physical-chemical  
 103 parameters analyzed at the two sites for the sampling month for Granollers Town  
 104 Council (polluted site) and Fortuño et al. [32] (unpolluted site). Other contaminants such  
 105 as contaminants of emerging concern (CEC) (pesticides, metals, industrial solvents,  
 106 pharmaceuticals and personal care products), could be found in other sites across these  
 107 basin [32].

108

109 **Fig 1. Map of the sampling sites in the Besòs River basin (NE of the Iberian**  
 110 **Peninsula).** The black point indicates the location of the polluted site in the Congost  
 111 River (50 m downstream from a WWTP) where the pre-exposed fish were caught. The  
 112 white point indicates the location of the unpolluted site in the Castelló stream.

113

114 **Table 1. Physical-chemical water parameters from polluted and unpolluted sites.**

| Physical-chemical parameters |                              | January 2016 |            | 2011 – 2015   |              |
|------------------------------|------------------------------|--------------|------------|---------------|--------------|
|                              |                              | Polluted     | Unpolluted | Polluted      | Unpolluted   |
| <b>General</b>               | <b>pH</b>                    | 8.0          | 8.0        | 8.0 ± 0.4     | 8.0 ± 0.3    |
|                              | <b>Oxygen (mg/L)</b>         | 7.8          | 5.5        | 8.1 ± 2.7     | 8.9 ± 2.4    |
| <b>Salinity</b>              | <b>Conductivity (µS/cm)</b>  | 1,112.0      | 444.7      | 1,062.5±107.5 | 613.9 ± 98.0 |
|                              | <b>Cl (mg/L)</b>             | 233.6        | 8.5        | 158.5 ± 40.8  | 13.2 ± 1.3   |
|                              | <b>SO<sub>4</sub> (mg/L)</b> | 91.4         | 13.5       | 85.0 ± 7.8    | 16.7 ± 3.9   |
| <b>Nutrients</b>             | <b>NO<sub>2</sub> (mg/L)</b> | 1.3          | 0.001      | 0.8 ± 0.7     | 0.007±0.003  |
|                              | <b>NO<sub>3</sub> (mg/L)</b> | 39.5         | 0.01       | 26.0 ± 3.4    | 0.1 ± 0.1    |
|                              | <b>TAN (mg/L)</b>            | 4.8          | 0.02       | 2.4 ± 0.1     | 0.04 ± 0.02  |
|                              | <b>PO<sub>4</sub> (mg/L)</b> | 5.3          | 0.003      | 4.1 ± 3.3     | 0.01 ± 0.01  |

115

116 Physical-chemical water parameters from both sites are shown for January 2016, when  
117 fish were sampled as well as the mean values for the period 2011 – 2015 (mean  $\pm$  SD).  
118 All these data were provided by the Granollers Town Council (polluted site) and by  
119 Fortuño et al. (2018) (unpolluted site).

120

121 Fish were sampled by electrofishing using a portable unit which generated up to  
122 200 V and 3 A pulsed D. C. A total of 72 individuals (40 in the polluted site and 32 in  
123 the unpolluted site) ranging from 5.5 to 10.8 cm were caught in January 2016. No  
124 differences in furcal length (FL, mean  $\pm$  SD = 7.79  $\pm$  1.31 cm) were found between the  
125 fish of the two sites. Once in the laboratory, fish of each site were acclimatized  
126 separately in 260 L aquaria over 21 days in clean dechlorinated water (there were 10-12  
127 fish per aquaria). Chlorine elimination was achieved by storing water from the drinking  
128 supply net in 200 L containers during 48 h. According to Kroupova et al. [33] fish  
129 affected by nitrite poisoning that were placed in clean water for over six days, recovered  
130 the normal haematological parameters. Therefore, a period of 21 days seemed sufficient  
131 for the fish from the polluted site to recover normal physiological parameters. Aquaria  
132 were set in an acclimated room (20°C) under a 12 h light: 12 h dark photoperiod. All  
133 260 L aquaria had the same equipment (biological filter and air diffusor), substrate (mix  
134 of sand, gravel, and coral with a proportion 2:2:1) and enough artificial refugees (PVC  
135 tubes and plastic plants) for reducing fish stress. Fish were fed “*ad libitum*” twice a day  
136 with frozen red chironomid larvae. A periodical cleaning of aquaria and partial water  
137 renovation (one-third of the volume) were carried out every 24 h. Physiochemical water  
138 conditions (mean  $\pm$  SD) were controlled daily in the 260 L aquaria (water temperature =  
139 21.97  $\pm$  0.98 °C, pH = 8.30  $\pm$  0.27, NO<sub>3</sub><sup>-</sup> = 5.63  $\pm$  1.70 mg/L, NO<sub>2</sub><sup>-</sup> = 0.00  $\pm$  0.00 mg/L,

140  $\text{NH}_4^+ = 0.00 \pm 0.00$  mg/L, and water hardness =  $10.50 \pm 4.36$ ). These parameters did not  
141 show significant differences between aquaria during fish acclimatization.

142

## 143 **Experimental design**

144 After the acclimatization period, fish pre-exposed to ammonia pollution in the wild  
145 (hereafter, pre-exposed fish) and fish from the unpolluted site (hereafter, non pre-  
146 exposed fish) were exposed to four TAN treatments (0, 1, 5 and 8 mg/L) as follows:  
147 each fish was placed in individual 20-L aquaria (40 cm large x 20 cm height x 25 cm  
148 deep) and transferred to the room where the experiment was carried out. The aquaria  
149 were divided into four groups and a treatment was randomly assigned to each group  
150 (Fig 2). For the Congost river (pre-exposed fish) there were ten aquariums per treatment  
151 ( $n = 40$ ), while for the Castelló stream (non pre-exposed fish), there were eight  
152 aquariums per treatment ( $n = 32$ ). Aquaria were positioned in two rows, side by side,  
153 within each group (Fig 2). In order to reduce fish stress, the lateral walls between  
154 neighboring aquaria were left transparent. To avoid fish interaction with the  
155 environment, the external and frontal walls as well as the bottom of aquaria were  
156 covered by blue acetate sheets. Before starting the experiment, each fish was  
157 acclimatized to its 20 L aquaria for four days and fed daily with red chironomid larvae.  
158 During these four days of fish acclimatization, partial water changes were carried out  
159 every day, and TAN concentrations were measured with indophenol blue  
160 spectrophotometric method (in all aquaria TAN concentration was maintained at 0  
161 mg/L; mean  $\pm$  SD =  $0.00 \pm 0.00$  mg/L).

162

163 **Fig 2. Individual experimental aquaria used for each TAN treatment.** A: Schematic  
164 representation of a group of 20 L individual aquaria used for each TAN treatment in the

165 experiment with *B. meridionalis* (aquaria were placed on a solid deck pallet to facilitate  
166 handling). B: PVC tube refuge. C: Transparent lateral walls between neighbouring  
167 aquaria. D: Red chironomid larvae used to observe feeding behaviour. E: Exterior and  
168 frontal walls of the aquaria covered with blue acetate sheets. F: Bottom of aquaria  
169 covered by a blue acetate sheet.

170

171 Next, fish were exposed to the assigned TAN treatment for eight days. The  
172 experiment was first carried out with the pre-exposed fish. After eight days, the  
173 experiment was repeated with the non pre-exposed fish. The TAN concentrations per  
174 experimental aquaria were achieved by adding analytical grade ammonium bicarbonate  
175 solutions ( $\text{NH}_4\text{HCO}_3$ , Sigma-Aldrich, Barcelona, Spain). These solutions were  
176 dispensed with automatic pipettes after water changes. A daily cleaning of aquaria and a  
177 two-third of the water volume renovation were carried out with dechlorinated water to  
178 guarantee the experimental conditions. TAN concentrations were measured daily by the  
179 indophenol blue spectrophotometric method. Once the absorbance values had been  
180 recorded for each sample,  $\text{NH}_4^+$  concentration was calculated using the equation of the  
181 calibration curve and the proportion of the  $\text{NH}_3$  form was calculated following Thurston  
182 et al. [34] procedures. During the experiment, the aquaria group of each TAN treatment  
183 was visually isolated from the researchers with opaque curtains. In order to observe the  
184 activity of fish, a PVC tube (4 cm diameter x 13 cm length) was placed in each 20 L  
185 aquaria as a fish refuge (Fig 2). In order to observe feeding activity, fish were fed above  
186 satiation requirements (20 red chironomid larvae per fish were sufficient to quantify  
187 satiety). Fish behaviour was recorded with an overhead shot for each group of aquaria  
188 (TAN treatment) using a Sony HD (HDR-SR1E) camera. The experiment lasted for  
189 eight days and recordings were made on alternative days (four days) between 9:00 and



190 12:00 AM. Every day, the recording order of each group of aquaria (TAN treatment)  
191 was established at random. Fish were only fed during the recording days. Two  
192 behavioural variables per individual were analyzed from video recordings: swimming  
193 activity (during 10') and feeding behaviour (until fish stopped eating). The swimming  
194 activity was analysed by three variables: (1) "Swimming", amount of time during which  
195 fish make displacements of the body using body or fin movement as propulsion (s), (2)  
196 "Not visible", amount of time during which the fish was not visible because it was  
197 remaining inside the shelter (s), and (3) "Resting", amount of time fish spent lying  
198 motionless on the bottom of the aquaria (s). Total swimming activity was expressed as a  
199 percentage of the total observation time [35]. Feeding behaviour was analysed by  
200 measuring: (1) "Latency", defined as the amount of time the fish took to start touching  
201 the food (s); (2) "Voracity", defined as the number of chironomid larvae the fish ate in  
202 one minute and (3) "Satiety", defined as the amount of time until the fish either stopped  
203 eating or they started spitting out the food (s).

204 The concentration of  $\text{NH}_3$  (mean  $\pm$  SD, mg/L) for each TAN treatment was not  
205 significantly different between pre-exposed and non pre-exposed fish (GLM): [0 mg/L]  
206 =  $0.007 \pm 0.010$ , [1 mg/L] =  $0.139 \pm 0.077$ , [5 mg/L] =  $0.534 \pm 0.218$ , [8 mg/L] =  $0.645$   
207  $\pm 0.237$ ). Physiochemical parameters were controlled daily for each 20 L aquaria during  
208 the experiment. No differences in physiochemical parameters (mean  $\pm$  SD) were found  
209 during the experiment between fish from the two sites and between the aquaria of each  
210 TAN group (GLM) (water temperature =  $21.27 \pm 0.45$  °C, pH =  $8.33 \pm 0.18$ ,  $\text{NO}_3^-$  =  
211  $4.81 \pm 0.68$  mg/L,  $\text{NO}_2^-$  =  $0.00 \pm 0.00$  mg/L, and water hardness =  $15.05 \pm 3.76$ ).

212 All applicable international, national, and/or institutional guidelines for the care and  
213 use of animals were followed. The scientific procedure of this work was approved by  
214 the Animal Ethic Committee of the University of Barcelona (registration N° 9296),

215 which follows European Directive 2010/63/UE on the protection of animals used for  
216 scientific purposes. One of the co-authors holds a category C FELASA certificate that  
217 regulates the use of animals for experimental and other scientific purposes.

218

## 219 **Biochemical determination**

220 For the biochemical determinations, fish were anesthetized on ice at the end of  
221 the experiment and euthanized by decapitation. Biomarkers were analysed in the liver  
222 tissue for each individual fish according to Faria et al. [36].

223 The following reagents were purchased from Sigma-Aldrich (St. Louis, MO, USA):  
224 potassium phosphate dibasic ( $K_2HPO_4$ ); potassium phosphate monobasic ( $KH_2PO_4$ );  
225 potassium chloride (KCl); ethylenediamine-tetraacetic acid, disodium, salt, dihydrate  
226 (EDTA); hydrogen peroxide ( $H_2O_2$ ); reduced glutathione (GSH); sodium azide; 1-  
227 chloro-2,4-dinitrobenzene (CDNB); glutathione S-transferase, from equine liver (GST)  
228 (EC 2.5.1.18); monochlorobimane (mCB); sodium pyruvate;  $\beta$ -Nicotinamide adenine  
229 dinucleotide, reduced dipotassium salt (NADH), 2,6-di-tert-butyl-4-methylphenol  
230 (BHT); 1-methyl-2-phenylindole (MPI); 1,1,3,3-tetramethoxypropane (TMP) and  
231 Bradford reagent. All the other chemicals were analytical grade and were obtained from  
232 Merck (Darmstadt, Germany).

233 Except for catalase activity, where a cuvette assay was used (Life Science UV/Vis  
234 Spectrophotometer DU® 730, Beckman Coulter – Fullerton, CA, USA), all the  
235 bioassays were performed in microplates (Synergy 2 Multi-Mode Microplate Reader,  
236 BioTek® Instruments – Vermont, USA).

237 Liver tissue was homogenized in ice-cold 0.1M phosphate buffer with 150mM KCl  
238 and 0.1mM ethylenediamine-tetraacetic acid, disodium, salt, dihydrate (EDTA), then

239 centrifuged at 10 000xg, 4°C for 30 minutes. The supernatant was collected, aliquoted  
240 and stored at -80°C for biomarker determination.

241 CAT activity was measured by estimating the decrease in absorbance at 240 nm  
242 due to H<sub>2</sub>O<sub>2</sub> (50 mM H<sub>2</sub>O<sub>2</sub> in 80 mM phosphate buffer, pH 6.5) consumption  
243 (extinction coefficient 40 M<sup>-1</sup>cm<sup>-1</sup>) according to Aebi [37]. Reaction volume and time  
244 were 1 mL and 1min, respectively. GST activity towards CDNB was measured as  
245 described by Habig et al. [38]. The reaction mixture contained 0.1M phosphate buffer  
246 (pH 7.4), 1 mM CDNB and 1 mM GSH. The formation of S – 2,4 dinitro phenyl  
247 glutathione conjugate was evaluated by monitoring the increase in absorbance at 340  
248 nm during 5 minutes. Enzyme activity was determined using GST's extinction factor  
249 coefficient of 9.6 mM<sup>-1</sup> cm<sup>-1</sup>. Results were normalized by tissue total assay protein  
250 content. Reduced glutathione (GSH) quantification was adapted from zebra mussel  
251 digestive gland according to Kamencic et al. [39]. It consists on adding 0.1mM of mCB  
252 along with 1U/ml of GST to each sample. Then the GSH present in the cells forming a  
253 GSH-mCB complex is measured fluorometrically at excitation: emission wave length of  
254 360:460 nm, after an incubation period of 90 minutes at room temperature and protected  
255 from light. The total content of GSH was then extrapolated from a GSH standard curve  
256 determined under the same physical and chemical conditions as the samples, and the  
257 results were normalized by the tissue wet weight (g ww).

258 Lactate dehydrogenase (LDH) activity was determined according to Diamantino et  
259 al. [22] by monitoring the absorbance decrease at 340 nm due to NADH oxidation. The  
260 reaction contained 100 mM phosphate buffer (pH 7.4), 0.15 mM NaOH, 1.18 mM  
261 pyruvate and 0.18 mM NADH.

262 Lipid peroxidation (LPO) was determined by quantifying the levels of  
263 malondialdehyde (MDA) according to Esterbauer et al. [40]. The MDA assay was based

264 on the reaction of the chromogenic reagent 1-methyl- 2-phenylindole with MDA at  
265 45°C, giving rise to a chromophore with absorbance at 586nm. Samples were incubated  
266 with 5mM 1-methyl- 2-phenylindole in acetonitrile:methanol (3:1 v/v), 5.55% of HCl  
267 and 0.01% BHT at 45°C, for 40 minutes. Absorbance was read at 560nm and MDA  
268 content in each sample was extrapolated from the standard curve of 1,1,3,3-  
269 tetramethoxypropane (TMP) treated under similar conditions as samples. The final  
270 results were normalized by tissue wet weight (g ww).

271 Total protein concentrations were accessed by the Bradford method using bovine  
272 serum albumin (BSA) as a standard [41].

273

## 274 **Statistical analyses**

275 Differences between TAN treatments and sites were analysed by means of a  
276 generalized lineal mixed model (GLMM). For swimming activity, “Swimming” and  
277 “Not visible” were analysed separately and used as dependent variable. The variable  
278 “Resting” was not analysed as it was a complementary variable to the other two. For  
279 feeding behaviour, “Latency”, “Voracity” and “Satiety” were analysed separately and  
280 used as dependent variables. In all cases “site” (2 levels: pre-exposed and non pre-  
281 exposed fish) and “TAN treatments” (4 levels: “0”, “1”, “5” and “8” mg/L TAN) were  
282 used as factors together with their interaction. The gamma distribution was assumed in  
283 the analysis of swimming activity and the Poisson distribution was assumed in the  
284 analysis of feeding behaviour. The variable “Individual” was added to the model as a  
285 random factor.

286 Biomarker responses across fish from the two sites (pre-exposed and non pre-  
287 exposed fish) and TAN treatments were analysed through a lineal model (LM) with the

288 same factors (“site” and “TAN treatments”) [42]. Differences between TAN treatments  
289 against control ones were further compared using Dunnett’s post-hoc test [42].

290 All analyses were conducted with R 3.4.3 [43]. GLMM assuming a Poisson or a  
291 gamma distribution was performed using `glmer()` (package “lme4”: [44]). Non-  
292 significant interactions were removed from final models. Homogeneity and normality of  
293 residuals were visually checked for all models. All significant differences are  $P \leq 0.05$ .

294

## 295 **Results**

### 296 **Behavioural variables**

297 The “Swimming” and “Not visible” GLMM models showed no significant effect of  
298 TAN treatments within and across sites (interaction) ( $P > 0.05$ ). Only a significant  
299 effect of site (pre-exposed and non pre-exposed fish) ( $P < 0.001$ ) was shown for these  
300 two variables. The swimming activity of fish that had been pre-exposed to ammonia  
301 pollution in the field was lower than that of non pre-exposed fish. Non pre-exposed fish  
302 swam for a longer time (67% of the time; mean = 643.89 s; 95% confidence interval =  
303 504.10 – 891.34) than pre-exposed fish (57.3% of the time; mean = 548.92 s; 95%  
304 confidence interval = 444.92 – 716.43) regardless of the TAN treatments they were in.  
305 Similarly, non pre-exposed fish spent significantly less time hidden inside the shelter  
306 (mean = 206.76 s; 95% confidence interval = 150.01 – 332.90) than pre-exposed fish  
307 (mean = 232.99 s; 95% confidence interval = 165.76 – 392.43).

308 The analysis of feeding behaviour showed no significant effects of the interaction  
309 between TAN treatment and site for none of the variables ( $P > 0.05$ ). For “Latency”  
310 GLMM model showed a significant effect between sites ( $P < 0.002$ ) but not for TAN  
311 treatments ( $P > 0.05$ ). Non pre-exposed fish had a higher latency than pre-exposed fish  
312 (Fig 3A). In contrast, GLMM models for “Voracity” and “Satiety” variables showed a

313 significant effect between sites and TAN treatments within each site ( $P < 0.001$ ). Non  
314 pre-exposed fish had a higher voracity (Fig 3B) and were satiated later (Fig 3C) than  
315 pre-exposed ones. In both cases (sites), significant differences were found between the  
316 control TAN concentration (0 mg/L) and the three TAN treatments (1, 5, 8 mg/L) for  
317 “Voracity” and “Satiety” variables.

318

319 **Fig 3. Feeding behaviour of *B. meridionalis* exposed to the TAN treatments during**  
320 **the experiment.** (a) Latency (time taken to start touching the food), (b) Voracity  
321 (number of red chironomid larvae eaten in one minute) and (c) Satiety (total number of  
322 red chironomid larvae fish eaten) are shown for the pre-exposed fish from the polluted  
323 site (black points and solid lines), and the non pre-exposed fish from the unpolluted site  
324 (white points and dashed lines). \* indicates significant differences ( $P < 0.05$ ) between  
325 the control concentration and the TAN treatments, following a generalized linear mixed  
326 model (GLMM).

327

### 328 **Biochemical determination**

329 The results of the analysis of biomarkers show that there were significant ( $P <$   
330  $0.05$ ) differences between sites (pre-exposed and non pre-exposed fish) in three out of  
331 the five studied biomarkers (Table 2, Fig 4). TAN treatment within and across sites  
332 (interaction) also affected the activities of CAT, GST and levels of LPO. Pre-exposed  
333 fish had lower CAT activities and lower levels of GSH, and the activities of CAT and  
334 levels of LPO increased across TAN treatments. In fish from both sites the activities of  
335 GST were enhanced at 1 mg/L of TAN (Fig 4).

336

337 **Fig 4. Antioxidant and oxidative stress responses (Mean  $\pm$  SE, N=10) of *B.***  
 338 ***meridionalis* exposed to increasing TAN concentrations during the experiment.**

339 Black and white bars indicate the results for the fish from the polluted site (pre-exposed  
 340 fish) and the unpolluted site (non pre-exposed fish), respectively. \* indicates significant  
 341 differences ( $P < 0.05$ ) within each site from control TAN treatment (0 mg/L TAN)  
 342 following LM model and Dunnett's post-hoc tests.

343

344 **Table 2. Linear model results for testing the effects of site and TAN on the studied**  
 345 **biomarkers in *B. meridionalis*.**

|            |                    | <b>df</b> | <b>F</b> | <b>P</b> |
|------------|--------------------|-----------|----------|----------|
| <b>GSH</b> | <b>Site</b>        | 1.28      | 46.5     | <0.001   |
|            | <b>TAN</b>         | 3.28      | 2.4      | 0.091    |
|            | <b>Interaction</b> | 3.28      | 0.5      | 0.713    |
| <b>CAT</b> | <b>Site</b>        | 1.51      | 50.5     | <0.001   |
|            | <b>TAN</b>         | 3.51      | 1.5      | 0.215    |
|            | <b>Interaction</b> | 3.51      | 2.9      | 0.043    |
| <b>GST</b> | <b>Site</b>        | 1.52      | 2.7      | 0.107    |
|            | <b>TAN</b>         | 3.52      | 4.7      | 0.005    |
|            | <b>Interaction</b> | 3.52      | 1.1      | 0.367    |
| <b>LDH</b> | <b>Site</b>        | 1.51      | 2.8      | 0.098    |
|            | <b>TAN</b>         | 3.51      | 0.4      | 0.782    |
|            | <b>Interaction</b> | 3.51      | 2.7      | 0.054    |
| <b>LPO</b> | <b>Site</b>        | 1.27      | 12.9     | 0.001    |
|            | <b>TAN</b>         | 3.27      | 6.3      | 0.002    |
|            | <b>Interaction</b> | 3.27      | 6.6      | 0.002    |

346

347 Degrees of freedom (df), Fisher's quotient (F) and probability levels (*P*) are shown.

348

## 349 **Discussion**

350 Chronic exposure to pollution by nitrogen inorganic compounds ( $\text{NH}_4^+$ ,  $\text{NH}_3$ ,  $\text{NO}_2^-$ ,  
351  $\text{HNO}_2$  and  $\text{NO}_3^-$ ) has effects on the reproduction, growth and survival of freshwater fish  
352 [2]. Specifically, exposure to  $\text{NH}_4^+$  and  $\text{NH}_3$  (TAN) pollution can cause gill damage,  
353 anoxia, disruption of blood vessels and osmoregulatory activity (damage to the liver and  
354 kidneys), and a decrease in the effectiveness of the immune system [1]. In addition,  
355  $\text{NH}_4^+$  ions contribute to an internal reduction of  $\text{Na}^+$  which, in turn, increases the  
356 toxicity by  $\text{NH}_3$  [2]. All these effects can result in a reduction in fish feeding activity,  
357 fecundity and survival, leading to a reduction of the size of populations [2].

358 In the present study, wild-caught fish pre-exposed for a long-term period to  
359 ammonia pollution in a contaminated river near a WWTP showed an altered behaviour  
360 and suffered from an increased physiological stress as compared to non pre-exposed  
361 fish from a pristine stream. Analysis of fish swimming activity showed that, regardless  
362 of the TAN treatments, pre-exposed fish were less active and spent more time hiding in  
363 the refuge than non pre-exposed fish. The only studies on the effects of ammonia on  
364 fish swimming activity have been conducted on salmonids, in laboratories or farms.  
365 According to Tudorache et al. [10] and Wicks et al. [9], the swimming activity of  
366 salmonids is reduced at concentrations between 0.2 - 1 mg/L of TAN (that is, at 0.009 –  
367 0.04 mg/L  $\text{NH}_3$ ). Pre-exposed fish spending more time inside the PVC shelters (“not  
368 visible” time) might indicate that these fish had their exploratory activity altered. A  
369 decrease in the exploratory activity has been reported in several fish species exposed to  
370 crude-oil pollution [45], pesticides [46] and pharmaceutical products [47].



371 The feeding behaviour of *B. meridionalis* was also altered. Pre-exposed fish had  
372 lower voracity than non pre-exposed fish regardless of the TAN treatments (0, 1, 5 and  
373 8 mg/L TAN). Within each site (pre-exposed and non pre-exposed fish), lower voracity  
374 was observed from the lowest TAN concentration (1 mg/L). A reduction in voracity has  
375 been reported for salmonids under TAN concentrations from 1 to 3 mg/L [10, 48, 49].  
376 According to Schram et al. [6], in a non salmonid fish (*Clarias gariepinus*), food  
377 consumption was also drastically reduced at TAN concentrations higher than 1 mg/L. In  
378 the present study, latency (the time that the fish took to start touching the food) was  
379 lower in pre-exposed fish, regardless of the TAN treatment. A low latency has been  
380 related to a low capacity to find food and capture prey [50]. Furthermore, several  
381 studies relate lower latency with lower efficiency to flee from predators [11, 51, 52].

382 The present study was conducted under a concentration of ammonia within the  
383 range of LC<sub>50</sub> (the tested range was from 0.007 to 0.645 mg/L NH<sub>3</sub>). However, the  
384 tolerance to NH<sub>3</sub> in cyprinids could be higher. The LC<sub>50</sub> for cyprinids ranked between  
385 0.685 and 1.720 mg/L NH<sub>3</sub> [1]. For cyprinids, the sublethal concentrations in which  
386 negative physiological effects begin to be observed has been described in a range of  
387 0.105 - 0.247 mg/L NH<sub>3</sub> [53 – 55]. The limits of tolerance to this and other compounds  
388 are variable depending on each fish species so that it would be necessary to investigate  
389 their effects under natural conditions.

390 Antioxidant enzyme activities such as those of CAT and reduced glutathione has  
391 been reported to be important antioxidant mechanisms against oxidative stress-mediated  
392 effects of ammonia in fish [8, 56 – 66]. Pre-exposed fish (from the polluted site) had  
393 lower constitutive levels of the above mentioned antioxidant defences and consequently  
394 were unable to detoxify the excess of reactive oxygen species (ROS) generated by  
395 ammonia, leading to enhanced tissue levels of oxidative damage measured as LPO.

396 Interestingly, only in fish from the polluted site (pre-exposed fish), the activities of  
397 CAT increased in individuals, exposed to ammonia, thus indicating that the exposure to  
398 this compound increased ROS and, hence, triggered the antioxidant defences of these  
399 fish. In fish from the unpolluted site (non pre-exposed fish), the high constitutive levels  
400 of antioxidant defences protected them from ROS generated by ammonia. [8] Sinha et  
401 al. (2014) reported that fish species intolerant to ammonia, such as trout, rely mainly on  
402 glutathione-dependent defensive mechanisms, while more tolerant species, such as  
403 carps, utilize antioxidant enzymes such as CAT and ascorbate. High tolerant species,  
404 such as goldfish, use both of these protective systems, and show more effective anti-  
405 oxidative compensatory responses towards oxidative stress induced by ammonia [8].  
406 Thus, our results are in line with previous studies, as *B. meridionalis* considered a  
407 tolerant species to ammonia.

408 Results in this study indicated that the exposition of fish to high ammonia  
409 concentrations did not guarantee, at least short term, the recovery of a good health status  
410 and/or a greater tolerance to a high concentration of this compound. Fish pre-exposed to  
411 ammonia pollution in the wild showed an altered behaviour at the control concentration  
412 (0 mg/L TAN). This could be a consequence of pre-existing physiological problems due  
413 to exposure to ammonia and other pollutants in nature [67 – 69]. The feeding behaviour  
414 and the response to the oxidative stress of *B. meridionalis* (both pre-exposed and no pre-  
415 exposed fish) follow the same pattern, reacting equally to the first 1 mg/L TAN  
416 treatment. However, pre-exposed fish had a more marked response in feeding behaviour  
417 and biomarkers under the different treatments of TAN. A reduction in food intake is  
418 directly related to both a lower growth and a low rate of protein synthesis [70].  
419 Reported studies have shown that low protein synthesis rates represent a large  
420 proportion of energy costs in fish, and this has a direct impact on the growth efficiency

421 of individuals [71]. Alteration of the behaviour parameters analysed in this study can be  
422 extrapolated to other traits such as exploration activity, boldness and ability to avoid  
423 predators [72]. Ammonia can affect social interactions as well, by altering dominance  
424 relationships, hierarchical dynamics and predator-prey relationships [10, 73].

425 Ammonia pollution is a common problem in freshwater ecosystems [7]. Despite the  
426 efforts of implementing the [74] European Water Framework Directive (2000/60/RC)  
427 (2000) there are still many WWTPs that do not have tertiary purification systems of  
428 urban wastewater, which leads to an increase in nitrogen compounds in aquatic  
429 ecosystems [75, 76]. Improving water quality is an important key to enhance the  
430 conservation of river ecosystems. However, our results indicated that fish that  
431 previously survived in a polluted environment did not recover their health in more  
432 purified waters. In summary, although habitats are improving their environmental  
433 quality, the survival of fish populations that have been pre-exposed to contamination  
434 could be compromised. In freshwater ecosystems, which have suffered an 83% decline  
435 in vertebrate populations from 1970 to 2014 [77], all factors affecting the survival of  
436 individuals are of great relevance.

437

## 438 **Conclusions**

439 *B. meridionalis* pre-exposed in the wild to pollution by ammonia presented a  
440 swimming activity, a feeding activity and the response to oxidative stress altered when  
441 placed in non contaminated water under experimental conditions. Feeding behaviour  
442 and the biomarker response of *B. meridionalis* was affected by ammonia and pollution  
443 history. Pre-exposed fish (from a polluted site) had less voracity and satiated before fish  
444 from an unpolluted site (non pre-exposed fish). In addition, pre-exposed fish were more  
445 affected by the different TAN treatments and these alterations appeared from the lowest

446 concentration of TAN (1 mg/L). The results of swimming activity showed that pre-  
447 exposed fish spent less time swimming and more time hidden. However, this  
448 behavioural response was not related to the different TAN treatments and could be  
449 related to the damage caused by pre-exposure to ammonia and other pollutants present  
450 in the river. Fish pre-exposed to ammonia in the wild also had the antioxidant defences  
451 depressed and consequently were less tolerant to high concentrations of ammonia.  
452 Therefore, our results indicated that the recovery of water quality is not necessarily  
453 related to the restoration of fish health. There is a physiological cost of being adapt to  
454 pollution present in rivers.

455

## 456 **Acknowledgements**

457 We thank I. Ramirez and F. López of the Department of Biochemistry and  
458 Molecular Biomedicine (University of Barcelona), for giving us access to their  
459 laboratory. We thank P. Fortuño (University of Barcelona) and X. Romero (biologist  
460 and superior technician of environment and natural environment of the Granollers Town  
461 Council) for provided data. We also thank J. Guinea and P. Manning for the assistance  
462 in the laboratory tasks. The authors are grateful to V. Bonet for the English review. This  
463 research did not receive any specific grant from funding agencies in the public,  
464 commercial, or not-for-profit sectors.

465

## 466 **References**

467 1. CEPA, Canadian Environmental Protection Act 1999. Priority Substances List  
468 Assesment Report – Priority substances assessment report: ammonia in the aquatic

- 469 environment. Minister of Public Works and Government Services, Canada. 2001  
470 Feb. 103 p.
- 471 2. Camargo JA, Alonso A. Ecological and toxicological effects of inorganic nitrogen  
472 pollution in aquatic ecosystems: a global assessment. *Environ Int.* 2006; 32: 831-  
473 849. doi:10.1016/j.envint.2006.05.002.
- 474 3. Baker LA, Herlihy AT, Kaufmann PR, Eilers JM. Acidic lakes and streams in the  
475 role of acidic deposition. *Science.* 1991; 252: 1151-1154. doi:  
476 10.1126/science.252.5009.1151.
- 477 4. Francis-Floyd R, Watson C, Petty D, Pounder DB. Ammonia in aquatic systems.  
478 UF/IFAS University of Florida (UF)/ Institute of Food and Agricultural Sciences  
479 (IFAS), FA 16. 2009; 1-4.
- 480 5. Benli ACK, Köksal G, Özkul A. Sublethal ammonia exposure of Nile tilapia  
481 (*Oreochromis niloticus* L.): Effects on gill, liver and kidney histology.  
482 *Chemosphere.* 2008; 72: 1355-1358. doi:10.1016/j.chemosphere.2008.04.037.
- 483 6. Schram E, Roques JAC, Abbink W, Spanings T, de Vries P, et al. The impact of  
484 elevated water ammonia concentration on physiology, growth and feed intake of  
485 African catfish (*Clarias gariepinus*). *Aquaculture.* 2010; 306: 108-115.  
486 doi:10.1016/j.aquaculture.2010.06.005.
- 487 7. EPA (U.S. Environmental Protection Agency). Aquatic life Ambient Water Quality  
488 Criteria for Ammonia (Freshwater). Office of Water EPA 822-R-18-002. 2013.  
489 Washington, D. C.
- 490 8. Sinha AK, AbdElgawad H, Giblen T, Zinta G, De Rop, M., Asard, H., et al. Anti-  
491 oxidative defences are modulated differentially in three freshwater teleosts in  
492 response to ammonia-induced oxidative stress. *PLoS ONE.* 2014; 9: e95319.  
493 doi:10.1371/journal.pone.0095319.

- 494 9. Wicks BJ, Joensen R, Tang Q, Randall DJ. Swimming and ammonia toxicity in  
495 salmonids: the effect of sub lethal ammonia exposure on the swimming  
496 performance of coho salmon and the acute toxicity of ammonia in swimming and  
497 resting rainbow trout. *Aquat Toxicol.* 2002; 59: 55-69. doi:10.1016/S0166-  
498 445X(01)00236-3.
- 499 10. Tudorache C, Blust R, Boeck G De. Social interactions, predation behaviour and  
500 fast start performance are affected by ammonia exposure in brown trout (*Salmo*  
501 *trutta* L.). *Aquat Toxicol.* 2008; 90: 145-153. doi:10.1016/j.aquatox.2008.08.009.
- 502 11. McKenzie DJ, Shingles A, Claireaux G, Domenic P. Sublethal concentrations of  
503 ammonia impair performance of the teleost fast-start escape response. *Physiol*  
504 *Biochem Zool.* 2009; 82: 353-362. doi:10.1086/590218.
- 505 12. Melvin SD, Wilson SP. The utility of behavioral studies for aquatic toxicology  
506 testing: a meta-analysis. *Chemosphere.* 2013; 93: 2217-2223.  
507 doi:10.1016/j.chemosphere.2013.07.036.
- 508 13. Bae MJ, Park YS. Biological early warning system based on the responses of  
509 aquatic organisms to disturbances: a review. *Sci Total Environ.* 2014; 466-467:  
510 635-649. doi:10.1016/j.scitotenv.2013.07.075.
- 511 14. Boyd CE. Ammonia Toxicity Degrades Animal Health, Growth. *Global*  
512 *aquaculture alliance.* 2013; 3.
- 513 15. Shrivastava J, Sinha AK, Datta SN, Blust R, De Boeck G. Pre-acclimation to low  
514 ammonia improves ammonia handling in common carp (*Cyprinus carpio*) when  
515 exposed subsequently to high environmental ammonia. *Aquat Toxicol.* 2016; 180:  
516 334-244. doi:10.1016/j.aquatox.2016.10.017.
- 517 16. McGeer JC, Nadella S, Alsop DH, Hollis L, Taylor LN, McDonald DG et al..  
518 Influence of acclimation and cross-acclimation of metals on acute Cd toxicity and

- 519 Cd uptake and distribution in rainbow trout (*Oncorhynchus mykiss*). *Aquat Toxicol.*  
520 2007; 84: 190-197. doi:10.1016/j.aquatox.2007.03.023.
- 521 17. Adeyemi JA, Klerks PL. Occurrence of copper acclimation in the least killifish  
522 *Heterandria formosa*, and associated biochemical and physiological mechanisms.  
523 *Aquat. Toxicol.* 2013; 130-131: 51-57. doi:10.1016/j.aquatox.2013.01.001.
- 524 18. Zheng J-L, Zhu Q-L, Wu C-W, Zhu A-Y, Shen B, Zeng L. Zinc acclimation  
525 mitigated high zinc induced oxidative stress by enhancing antioxidant defenses in  
526 large yellow croaker *Pseudosciaena crocea*. *Aquat Toxicol.* 2016; 172: 21-29.  
527 doi:10.1016/j.aquatox.2015.12.009.
- 528 19. Rees BB, Sudradjat FA, Love JW. Acclimation to hypoxia increases survival time  
529 of zebrafish, *Danio rerio*, during lethal hypoxia. *J Exp Zool.* 2001; 289: 266-272.  
530 doi:10.1002/1097-010X(20010401/30)289:4<266::AID-JEZ7>3.0.CO;2-5.
- 531 20. Al-Amoudi MM. Acclimation of commercially cultured *Oreochromis* species to sea  
532 water-an experimental study. *Aquaculture.* 1987; 65: 333-342. doi:10.1016/0044-  
533 8486(87)90245-6.
- 534 21. Long Y, Song GL, Yan JJ, He XZ, Li Q, Cui, ZB. Transcriptomic characterization  
535 of cold acclimation in larval zebrafish. *BMC Genom.* 2013; 14: 612.  
536 doi:10.1186/1471-2164-14-612.
- 537 22. Diamantino TC, Almeida E, Soares AMVM, Guilhermino L. Lactate  
538 dehydrogenase activity as an effect criterion in toxicity tests with *Daphnia magna*  
539 *straus*. *Chemosphere.* 2001; 45: 553-560. doi:10.1016/S0045-6535(01)00029-7.
- 540 23. van der Oost R, Beyer J, Vermeulen NPE. Fish bioaccumulation and biomarkers in  
541 environmental risk assessment: a review. *Environ Toxicol Pharmacol.* 2003; 13:  
542 57-149. doi:10.1016/S1382-6689(02)00126-6.

- 543 24. Viarengo A, Pertica M, Canesi L, Accomando R, Mancinelli G, Orunesu M. Lipid  
544 peroxidation and level of antioxidant compounds (GSH, Vitamin E) in the digestive  
545 glands of mussels of three different age groups exposed to anaerobic and aerobic  
546 conditions. *Mar Environ Res.* 1989; 28: 291-295. doi:10.1016/0141-  
547 1136(89)90246-8.
- 548 25. Halliwell B, Gutteridge JMC. *Free radicals in biology and medicine.* Oxford  
549 University Press, Oxford. 1999.
- 550 26. Aparicio E, Vargas MJ, Olmo JM, Sostoa A de. Decline of native freshwater fishes  
551 in a Mediterranean watershed on the Iberian Peninsula: a quantitative assessment.  
552 *Environ Biol Fish.* 2000; 59: 11-19. doi:10.1023/A:1007618517557.
- 553 27. Crivelli AJ. *Barbus haasi*. The IUCN Red List of Threatened Species 2006:  
554 e.T2578A9457709. 2006. Available from: <http://dx.doi.org/10.2305>.
- 555 28. Colin N, Maceda-Veiga A, Monroy M, Ortega-Ribera M, Llorente M, Sostoa A de.  
556 Trends in biomarkers, biotic indices, and fish population size revealed contrasting  
557 long-term effects of recycled water on the ecological status of a Mediterranean  
558 river. *Ecotoxicol Environ Saf.* 2017; 145: 340-348.  
559 doi:10.1016/j.ecoenv.2017.07.048.
- 560 29. Sostoa A de, Caiola N, Vinyoles D, Casals F. Diagnosi de les poblacions de peixos  
561 del Parc Natural de Sant Llorenç del Munt i l'Obac. University of Barcelona,  
562 Technical report. 2002.
- 563 30. Vinyoles D, Mejías N, García-Galea E, Quirós C. Avaluació de les poblacions de  
564 peixos al Municipi de Granollers. University of Barcelona, Technical report. 2011.
- 565 31. Fortuño P, Bonada N, Prat N, Acosta R, Cañedo-Argüelles M, Castro D, et al.  
566 Efectes del Canvi Ambiental en les comunitats d'organismes dels RIus  
567 MEDiterranis (CARIMED). Informe 2017. Diputació de Barcelona. Àrea d'Espais



- 568 Naturals (Estudis de la Qualitat Ecològica dels Rius; 27). 2018. Available from:  
569 <http://www.ub.edu/barcelonarius/web/index.php/informe-2017>.
- 570 32. Soler P, Solé M, Bañón R, García-Galea E, Durfort M, Matamoros V, et al. Effects  
571 of industrial pollution on the reproductive biology of *Squalius laietanus*  
572 (Actinopterygii, Cyprinidae) in a Mediterranean stream (NE Iberian Peninsula).  
573 Fish Physiol Biochem. 2020; 46: 247-264. doi:10.1007/s10695-019-00713-7
- 574 33. Kroupova H, Machova J, Svobodova Z, Piackova V, Smutna M. The ability of  
575 recovery in common carp after nitrite poisoning. Vet Med Czech. 2006; 51: 423-  
576 431. doi:10.17221/5567-VETMED.
- 577 34. Thurston R, Russo R, Emerson K. Aqueous ammonia equilibrium - tabulation of  
578 percent unionised ammonia: U.S. Environmental Protection Agency, Duluth,  
579 Minnesota. 1979.
- 580 35. Mas-Muñoz J, Komen H, Schneider O, Visch SW, Schrama JW. Feeding behavior,  
581 swimming activity and boldness explain variation in feed intake and growth of Sole  
582 (*Solea solea*) reared in captivity. PLoS ONE. 2011; 6: e21394.  
583 doi:10.1371/journal.pone.0021393.
- 584 36. Faria M, Carrasco L, Diez S, Riva MC, Bayona JM, Barata C. Multi-biomarker  
585 responses in the freshwater mussel *Dreissena polymorpha* exposed to  
586 polychlorobiphenyls and metals. Comp Biochem Physiol - C Toxicol Pharmacol.  
587 2009; 149: 281-288. doi:10.1016/j.cbpc.2008.07.012.
- 588 37. Aebi H. Roland Richterich (1927-1973). Ann Biol Clin-Paris. 1974; 32: 301.
- 589 38. Habig WH, Pabst MJ, Jakoby WB. Glutathione S-transferase - First enzymatic step  
590 in mercapturic acid formation. J Biol Chem. 1974; 249: 7130-7139.

- 591 39. Kamencic H, Lyon A, Paterson PG, Juurlink BHJ. Monochlorobimane fluorometric  
592 method to measure tissue glutathione. *Anal Biochem.* 2000; 286: 35-37.  
593 doi:10.1006/abio.2000.4765.
- 594 40. Esterbauer H, Schaur RJ, Zollner H. Chemistry and Biochemistry of 4-  
595 hydroxynonenal, malonaldehyde and related aldehydes. *Free Radical Biol Med.*  
596 1991; 11: 81-128. doi:10.1016/0891-5849(91)90192-6.
- 597 41. Bradford MM. Rapid and Sensitive Method for Quantitation of Microgram  
598 Quantities of Protein Utilizing Principle of Protein-Dye Binding. *Anal Biochem.*  
599 1976; 72: 248-254. doi:10.1016/0003-2697(76)90527-3
- 600 42. Zar JH. *Biostatistical Analysis*, 3rd ed. Bioestatistical Analysis Prentice-Hall  
601 International, Inc, New Jersey; 1996.
- 602 43. R Core Team. R: A language and environment for statistical computing. R  
603 Foundation for Statistical Computing, Vienna, Austria. 2017. Available from:  
604 <https://www.R-project.org/>.
- 605 44. Bates D, Mächler M, Bolker B, Walker S. Fitting linear mixed-effects models using  
606 lme4. *J Stat Softw.* 2015. doi:10.18637/jss.v067.i01.
- 607 45. Jacquin L, Dybwad C, Rolshausen G, Hendry AP, Reader SM. Evolutionary and  
608 immediate effects of crude-oil pollution: depression of exploratory behaviour  
609 across populations of Trinidadian guppies. *Anim Cogn.* 2017; 20: 97-108.  
610 doi:10.1007/s10071-016-1027-9.
- 611 46. Davy FB, Kleerekoper H, Matis JH. Effects of exposure to sublethal DDT on the  
612 exploratory behavior of goldfish (*Carassius auratus*). *Water Resour Res.* 1973; 9:  
613 900-905. doi:10.1029/WR009i004p00900.

- 614 47. Reyhanian N, Volkova K, Hallgren S, Bollner T, Olsson PE, Olsén KH, et al. 17 $\alpha$ -  
615 ethynyl estradiol affect anxiety and shoaling behavior in adult zebra fish (*Danio*  
616 *rerio*). *Aquat Toxicol.* 2011; 105: 41-48. doi:10.1016/j.aquatox.2011.05.009.
- 617 48. Wicks BJ, Randall DJ. The effect of feeding and fasting on ammonia toxicity in  
618 juvenile rainbow trout, *Oncorhynchus mykiss*. *Aquat Toxicol.* 2002; 59: 71-82.  
619 doi:10.1016/S0166-445X(01)00237-5.
- 620 49. Ortega VA, Renner KJ, Bernier NJ. Appetite-suppressing effects of ammonia  
621 exposure in rainbow trout associated with regional and temporal activation of brain  
622 monoaminergic and CRF systems. *J Exp Biol.* 2005; 208: 1855-1866.  
623 doi:10.1242/jeb.01577.
- 624 50. Lima SL, Dill LM. Behavioral decisions made under the risk of predation – a  
625 review and prospectus. *Can J Zool.* 1990; 68: 619-640. doi:10.1139/z90-092.
- 626 51. Whitham J, Mathis A. Effects of hunger and predation risk on foraging behaviour  
627 of graybelly salamanders, *Eurycea multiplicata*. *J Chem Ecol.* 2000; 26: 1659-  
628 1665. doi:10.1023/A:1005590913680.
- 629 52. Yamamoto T, Reinhardt UG. Dominance and predator avoidance in domesticated  
630 and wild masu salmon, *Oncorhynchus masou*. *Fish Sci.* 2003; 69: 88-94.
- 631 53. Swigert J, Spacie A. Survival and growth of warmwater fishes exposed to ammonia  
632 under low flow conditions. IWRRC Technical Reports. Paper 157. 1983. 95 p.
- 633 54. Mayes M, Alexander H, Hopkins D, Latvaitis P. Acute and chronic toxicity of  
634 ammonia to freshwater fish: a site-specific study. *Environ Toxicol Chem.* 1986; 5:  
635 437-442. doi:10.1002/etc.5620050503.
- 636 55. Thurston R, Russo R, Meyn E, Zajdel R, Smith C. Chronic toxicity of ammonia to  
637 fathead minnows. *Trans Am Fish Soc.* 1986; 115: 196-207. doi:10.1577/1548-  
638 8659(1986)115<196:CTOATF>2.0.CO;2.

- 639 56. Hegazi MM, Attia ZI, Ashour OA. Oxidative stress and antioxidant enzymes in  
640 liver and white muscle of Nile tilapia juveniles in chronic ammonia exposure.  
641 *Aquat Toxicol.* 2010; 99: 118-125. doi:10.1016/j.aquatox.2010.04.007.
- 642 57. Yang W, Xiang F, Liang L, Yang Z. Toxicity of ammonia and its effects on  
643 oxidative stress mechanisms of juvenile crucian carp (*Carassius auratus*). *J Freshw*  
644 *Ecol.* 2010; 25: 297-302. doi:10.1080/02705060.2010.9665080.
- 645 58. Pan CH, Chien YH, Wang YJ. Antioxidant defence to ammonia stress of characins  
646 (*Hyphessobrycon eques* Steindachner) fed diets supplemented with carotenoids.  
647 *Aquac Nutr.* 2011; 17: 258-266. doi:10.1111/j.1365-2095.2009.00747.x.
- 648 59. Yang W, Sun H, Xiang F, Yang Z, Chen Y. Response of juvenile crucian carp  
649 (*Carassius auratus*) to long-term ammonia exposure: Feeding, growth, and  
650 antioxidant defenses. *J Freshw Ecol.* 2011; 26: 563-570.  
651 doi:10.1080/02705060.2011.570944.
- 652 60. Sun H, Lü K, Minter EJA, Chen Y, Yang Z, Montagnes DJS. Combined effects of  
653 ammonia and microcystin on survival, growth, antioxidant responses, and lipid  
654 peroxidation of bighead carp *Hypophthalmichthys nobilis* larvae. *J Hazard Mater.*  
655 2012; 221-222: 213-219. doi:10.1016/j.jhazmat.2012.04.036.
- 656 61. Sun H, Wang W, Li J, Yang Z. Growth, oxidative stress responses, and gene  
657 transcription of juvenile bighead carp (*Hypophthalmichthys nobilis*) under chronic-  
658 term exposure of ammonia. *Environ Toxicol Chem.* 2014; 33: 1726-1731.  
659 doi:10.1002/etc.2613.
- 660 62. Cheng CH, Yang FF, Ling RZ, Liao SA, Miao YT, Ye CX et al. Effects of  
661 ammonia exposure on apoptosis, oxidative stress and immune response in  
662 pufferfish (*Takifugu obscurus*). *Aquat Toxicol.* 2015; 164: 61-71.  
663 doi:10.1016/j.aquatox.2015.04.004.

- 664 63. Li M, Gong S, Li Q, Yuan L, Meng F, Wang R. Ammonia toxicity induces  
665 glutamine accumulation, oxidative stress and immunosuppression in juvenile  
666 yellow catfish *Pelteobagrus fulvidraco*. *Comp Biochem Physiol - C Toxicol*  
667 *Pharmacol.* 2016; 183-184: 1-6. doi:10.1016/j.cbpc.2016.01.005.
- 668 64. Ren Q, Li M, Yuan L, Song M, Xing X, Shi G, et al. Acute ammonia toxicity in  
669 crucian carp *Carassius auratus* and effects of taurine on hyperammonemia. *Comp*  
670 *Biochem Physiol - C Toxicol Pharmacol.* 2016; 190: 9-14.  
671 doi:10.1016/j.cbpc.2016.08.001.
- 672 65. Zhang L, Zhao ZG, Fan QX. Effects of ammonia on growth, digestion and  
673 antioxidant capacity in juvenile yellow catfish *Pelteobagrus fulvidraco*  
674 (Richardson, 1846). *J Appl Ichthyol.* 2016; 32: 1205-1212. doi:10.1111/jai.13203.
- 675 66. Maltez LC, Stringhetta GR, Enamorado AD, Okamoto MH, Romano LA,  
676 Monserrat JM, et al. Ammonia exposure and subsequent recovery trigger oxidative  
677 stress responses in juveniles of Brazilian flounder *Paralichthys orbignyanus*. *Fish*  
678 *Physiol Biochem.* 2017; 43: 1747-1759. doi:10.1007/s10695-017-0406-8.
- 679 67. Weis JS, Khan AA. Reduction in prey-capture ability and condition of  
680 mummichogs from a polluted habitat. *Trans Am Fish Soc.* 1991; 120: 127-129.  
681 doi:10.1577/1548-8659(1991)120<0127:NRIPCA>2.3.CO;2.
- 682 68. Smith G, Weis JS. Predator/prey interactions in *Fundulus heteroclitus*: effects of  
683 living in a polluted environment. *J Exp Mar Biol Ecol.* 1997; 209: 75-87.  
684 doi:10.1016/S0022-0981(96)02590-7.
- 685 69. Weis JS, Smith G, Zhou T, Santiago-Bass C, Weis P. Effects of contaminants on  
686 behavior: biochemical mechanisms and ecological consequences. *Bioscience.* 2001;  
687 51: 209-217. doi:10.1641/0006-3568(2001)051[0209:EOCOBB]2.0.CO;2.

- 688 70. Carter CG, Houlihan DF, McCarthy ID, Brafield AE. Variation in the food intake  
689 of grass carp, *Ctenopharyngodon idella* (Val.), fed singly or in groups. *Aquat*  
690 *Living Resour.* 1992; 5: 225-228. doi:10.1051/alr:1992022.
- 691 71. McCarthy ID, Houlihan DF, Carter CG. Individual Variation in Protein Turnover  
692 and Growth Efficiency in Rainbow Trout, *Oncorhynchus mykiss* (Walbaum). *Proc*  
693 *Royal Soc B.* 1994; 257: 141-147. doi:10.1098/rspb.1994.0107.
- 694 72. Scott GR, Sloman KA. The effects of environmental pollutants on complex fish  
695 behaviour: integrating behavioural and physiological indications of toxicity. *Aquat*  
696 *Toxicol.* 2004; 68: 369-392. doi:10.1016/j.aquatox.2004.03.016.
- 697 73. Grobler JMB, Wood CM. The effects of high environmental ammonia on the  
698 structure of rainbow trout hierarchies and the physiology of the individuals therein.  
699 *Aquat Toxicol.* 2018; 195: 77-87. doi:10.1016/j.aquatox.2017.12.006.
- 700 74. European Water Framework Directive (2000/60/EC). Directive 2000/60/EC of the  
701 European Parliament and of the council of 23 October 2000 establishing a  
702 framework for community action in the field of water policy. *Official Journal of the*  
703 *European Communities.* 2000 Oct. 73 p.
- 704 75. Grizzetti B, Bouraoui F, Billen G, van Grinsven H, Cardoso AC, Thieu V, et al.  
705 Nitrogen as a threat to European water quality. In: Sutton M, Howard C, Erisman J,  
706 Billen G, Bleeker A, Grennfelt P, van Grinsven H, Grizzetti B, editors. *The*  
707 *European Nitrogen Assessment: Sources, Effects and Policy Perspectives.*  
708 *Cambridge University Press, Cambridge.* 2011. p. 379-404.
- 709 76. Arenas-Sánchez A, Rico A, Rivas-Tabares D, Blanco A, García-Doncel P, Romero-  
710 Salas A, et al. Identification of contaminants of concern in upper Tagus river basin  
711 (central Spain). Part 2: Spatio-temporal analysis and ecological risk assessment. *Sci*  
712 *Total Environ.* 2019; 667: 222-233. doi:10.1016/j.scitotenv.2019.02.286.

713 77. WWF. Living planet report – 2018: aiming higher. Grooten M, Almond REA,  
714 editors. WWF, Gland, Switzerland. 2018 Oct. 148 p.

715

716

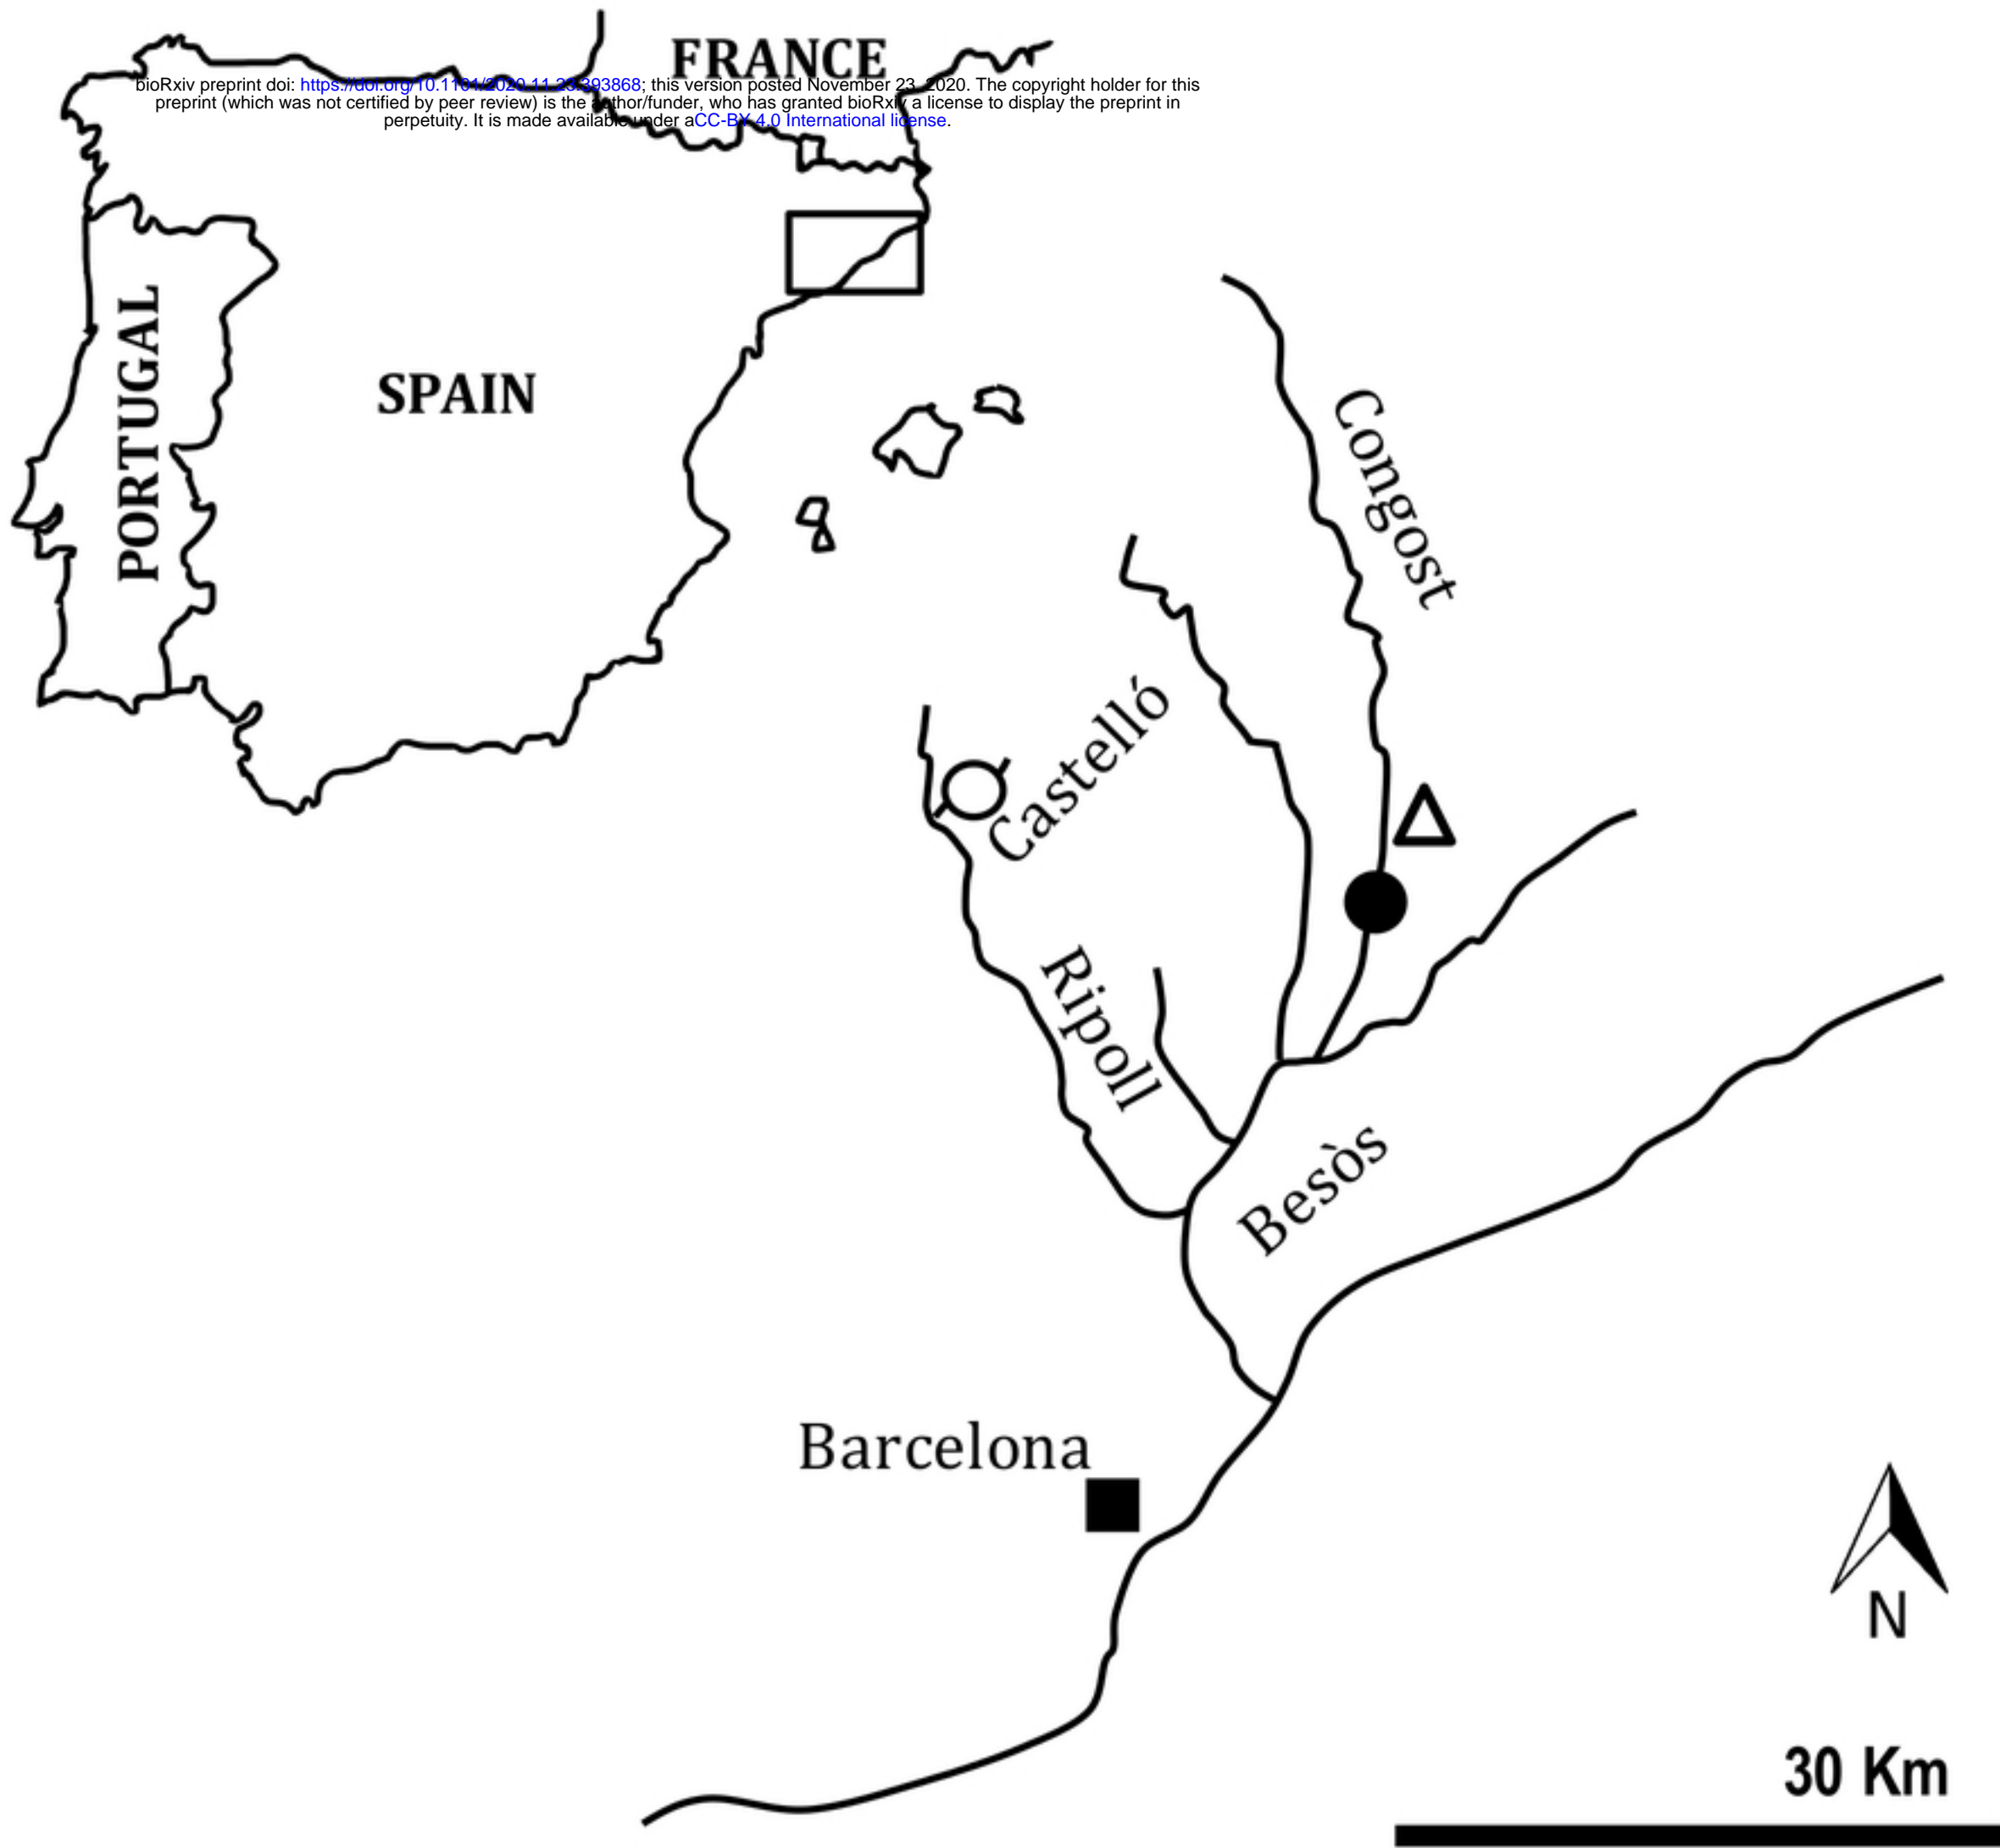

Figure 1





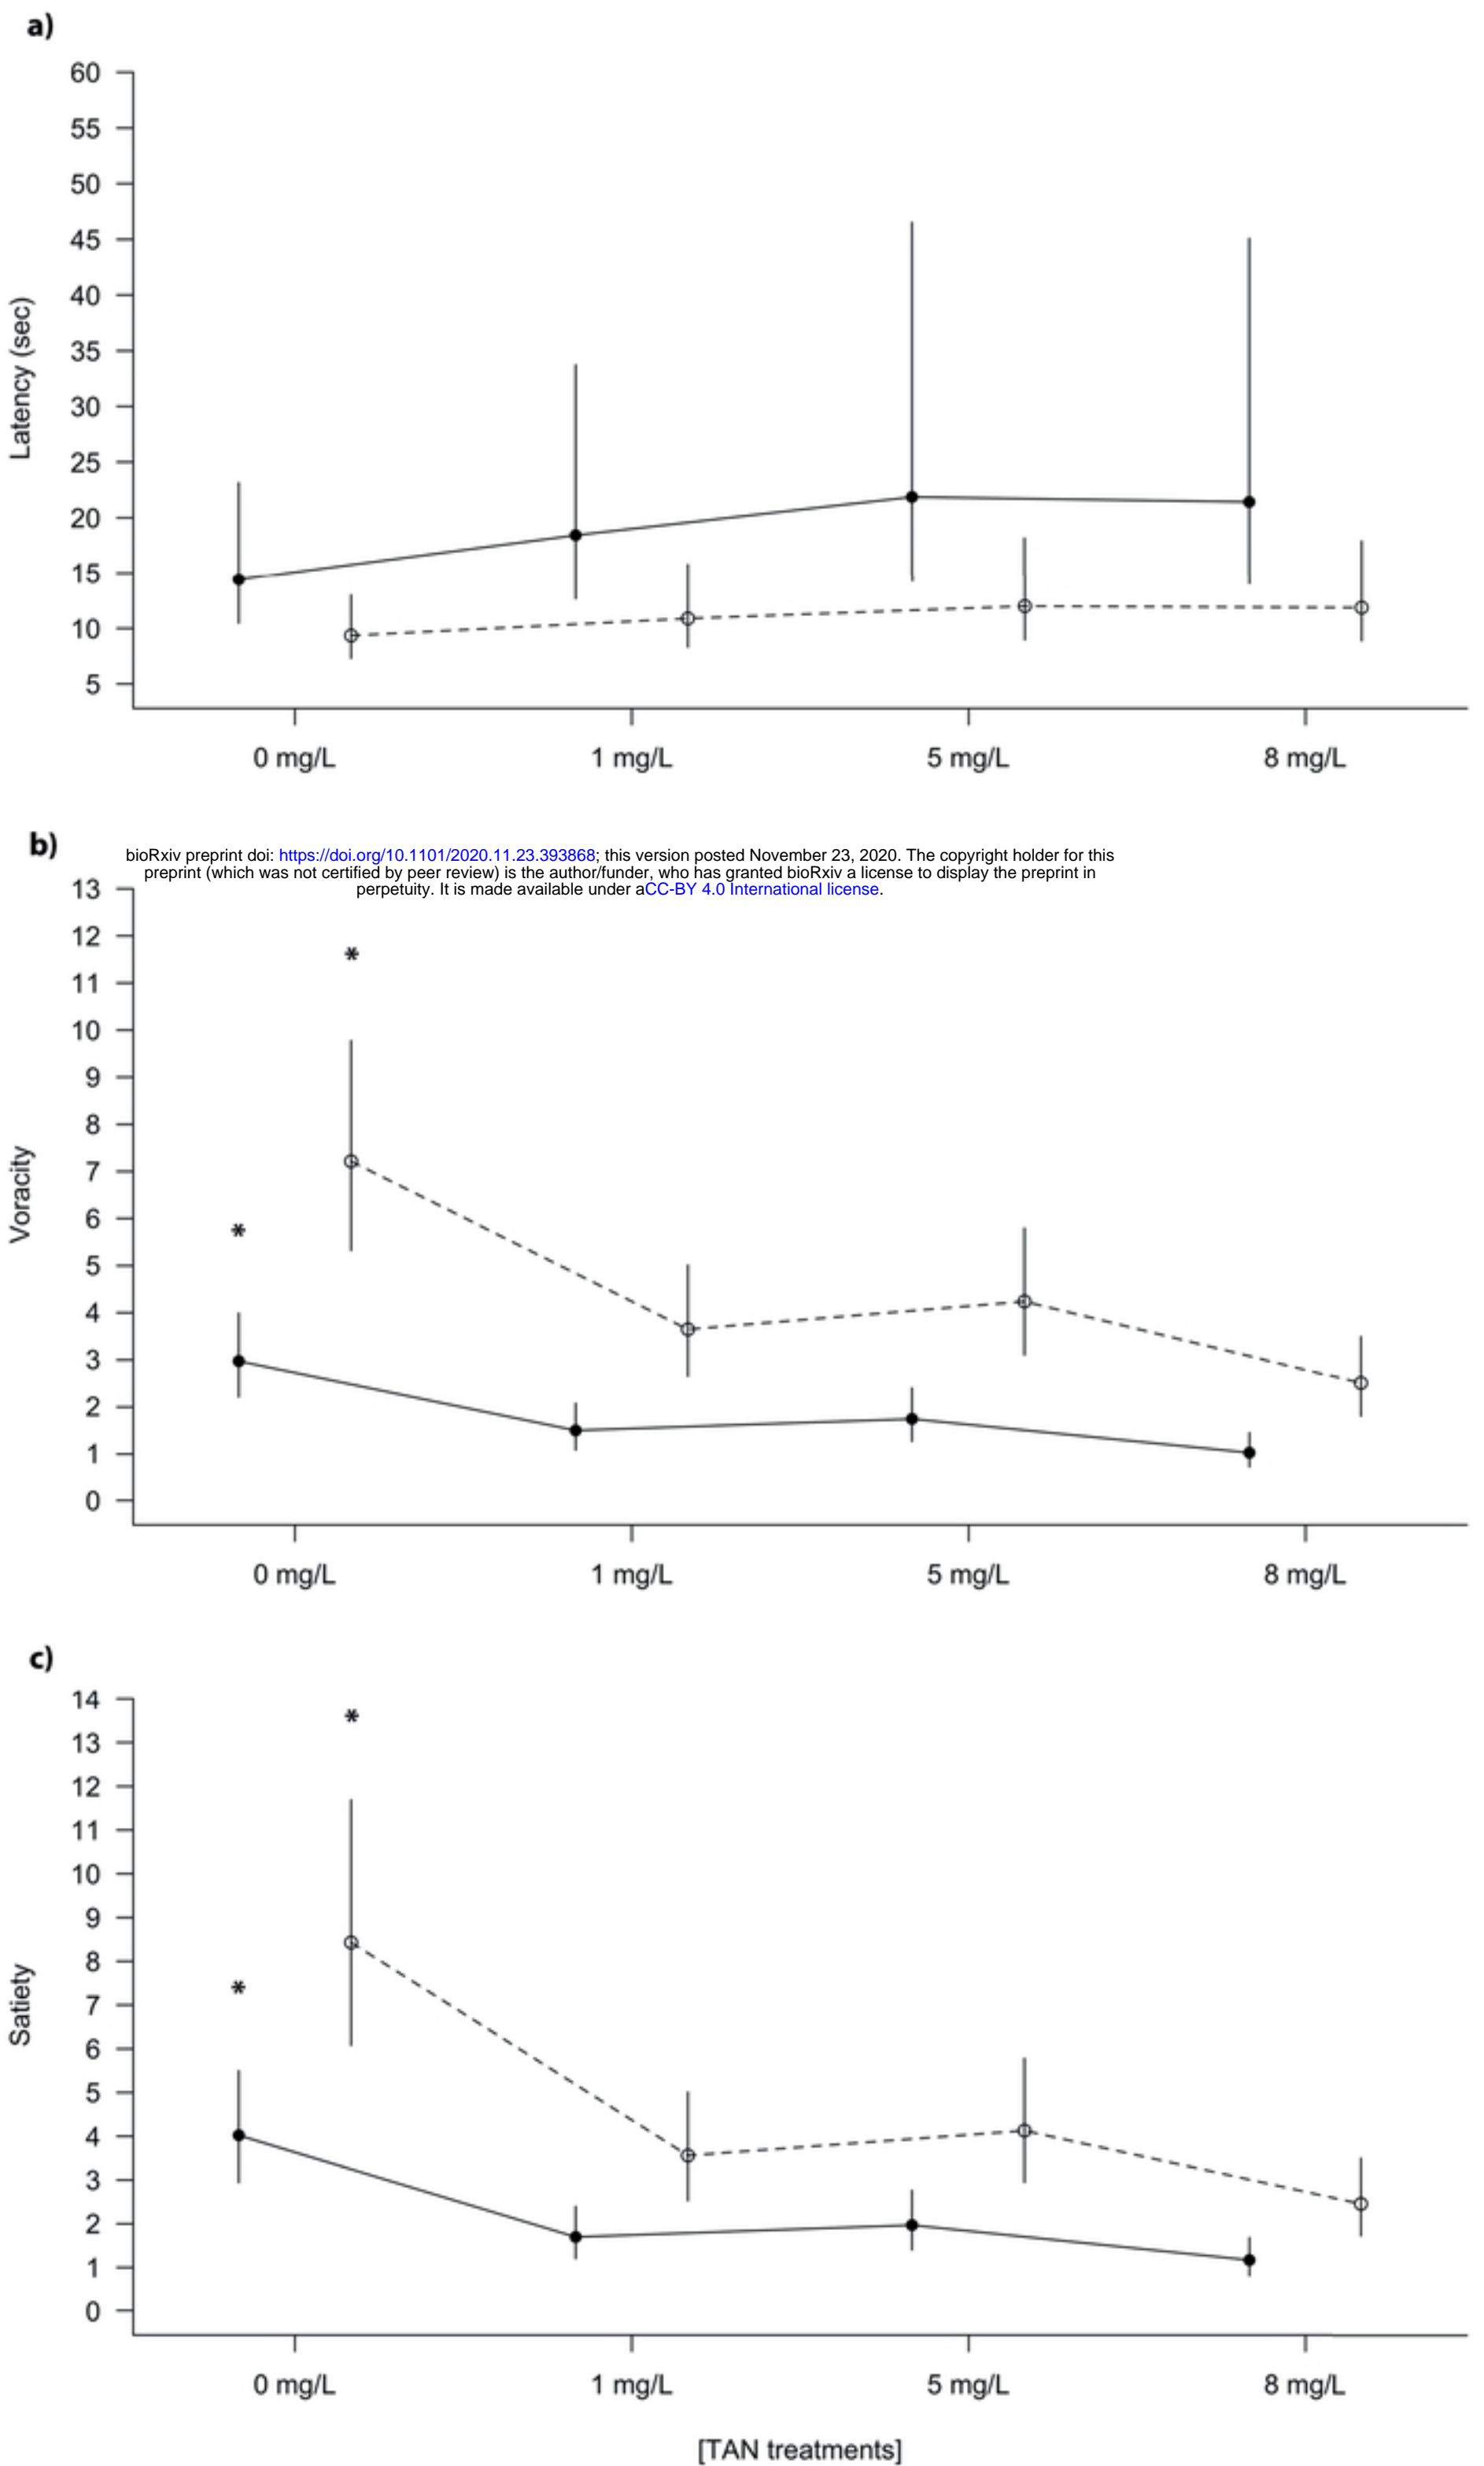

Figure 3

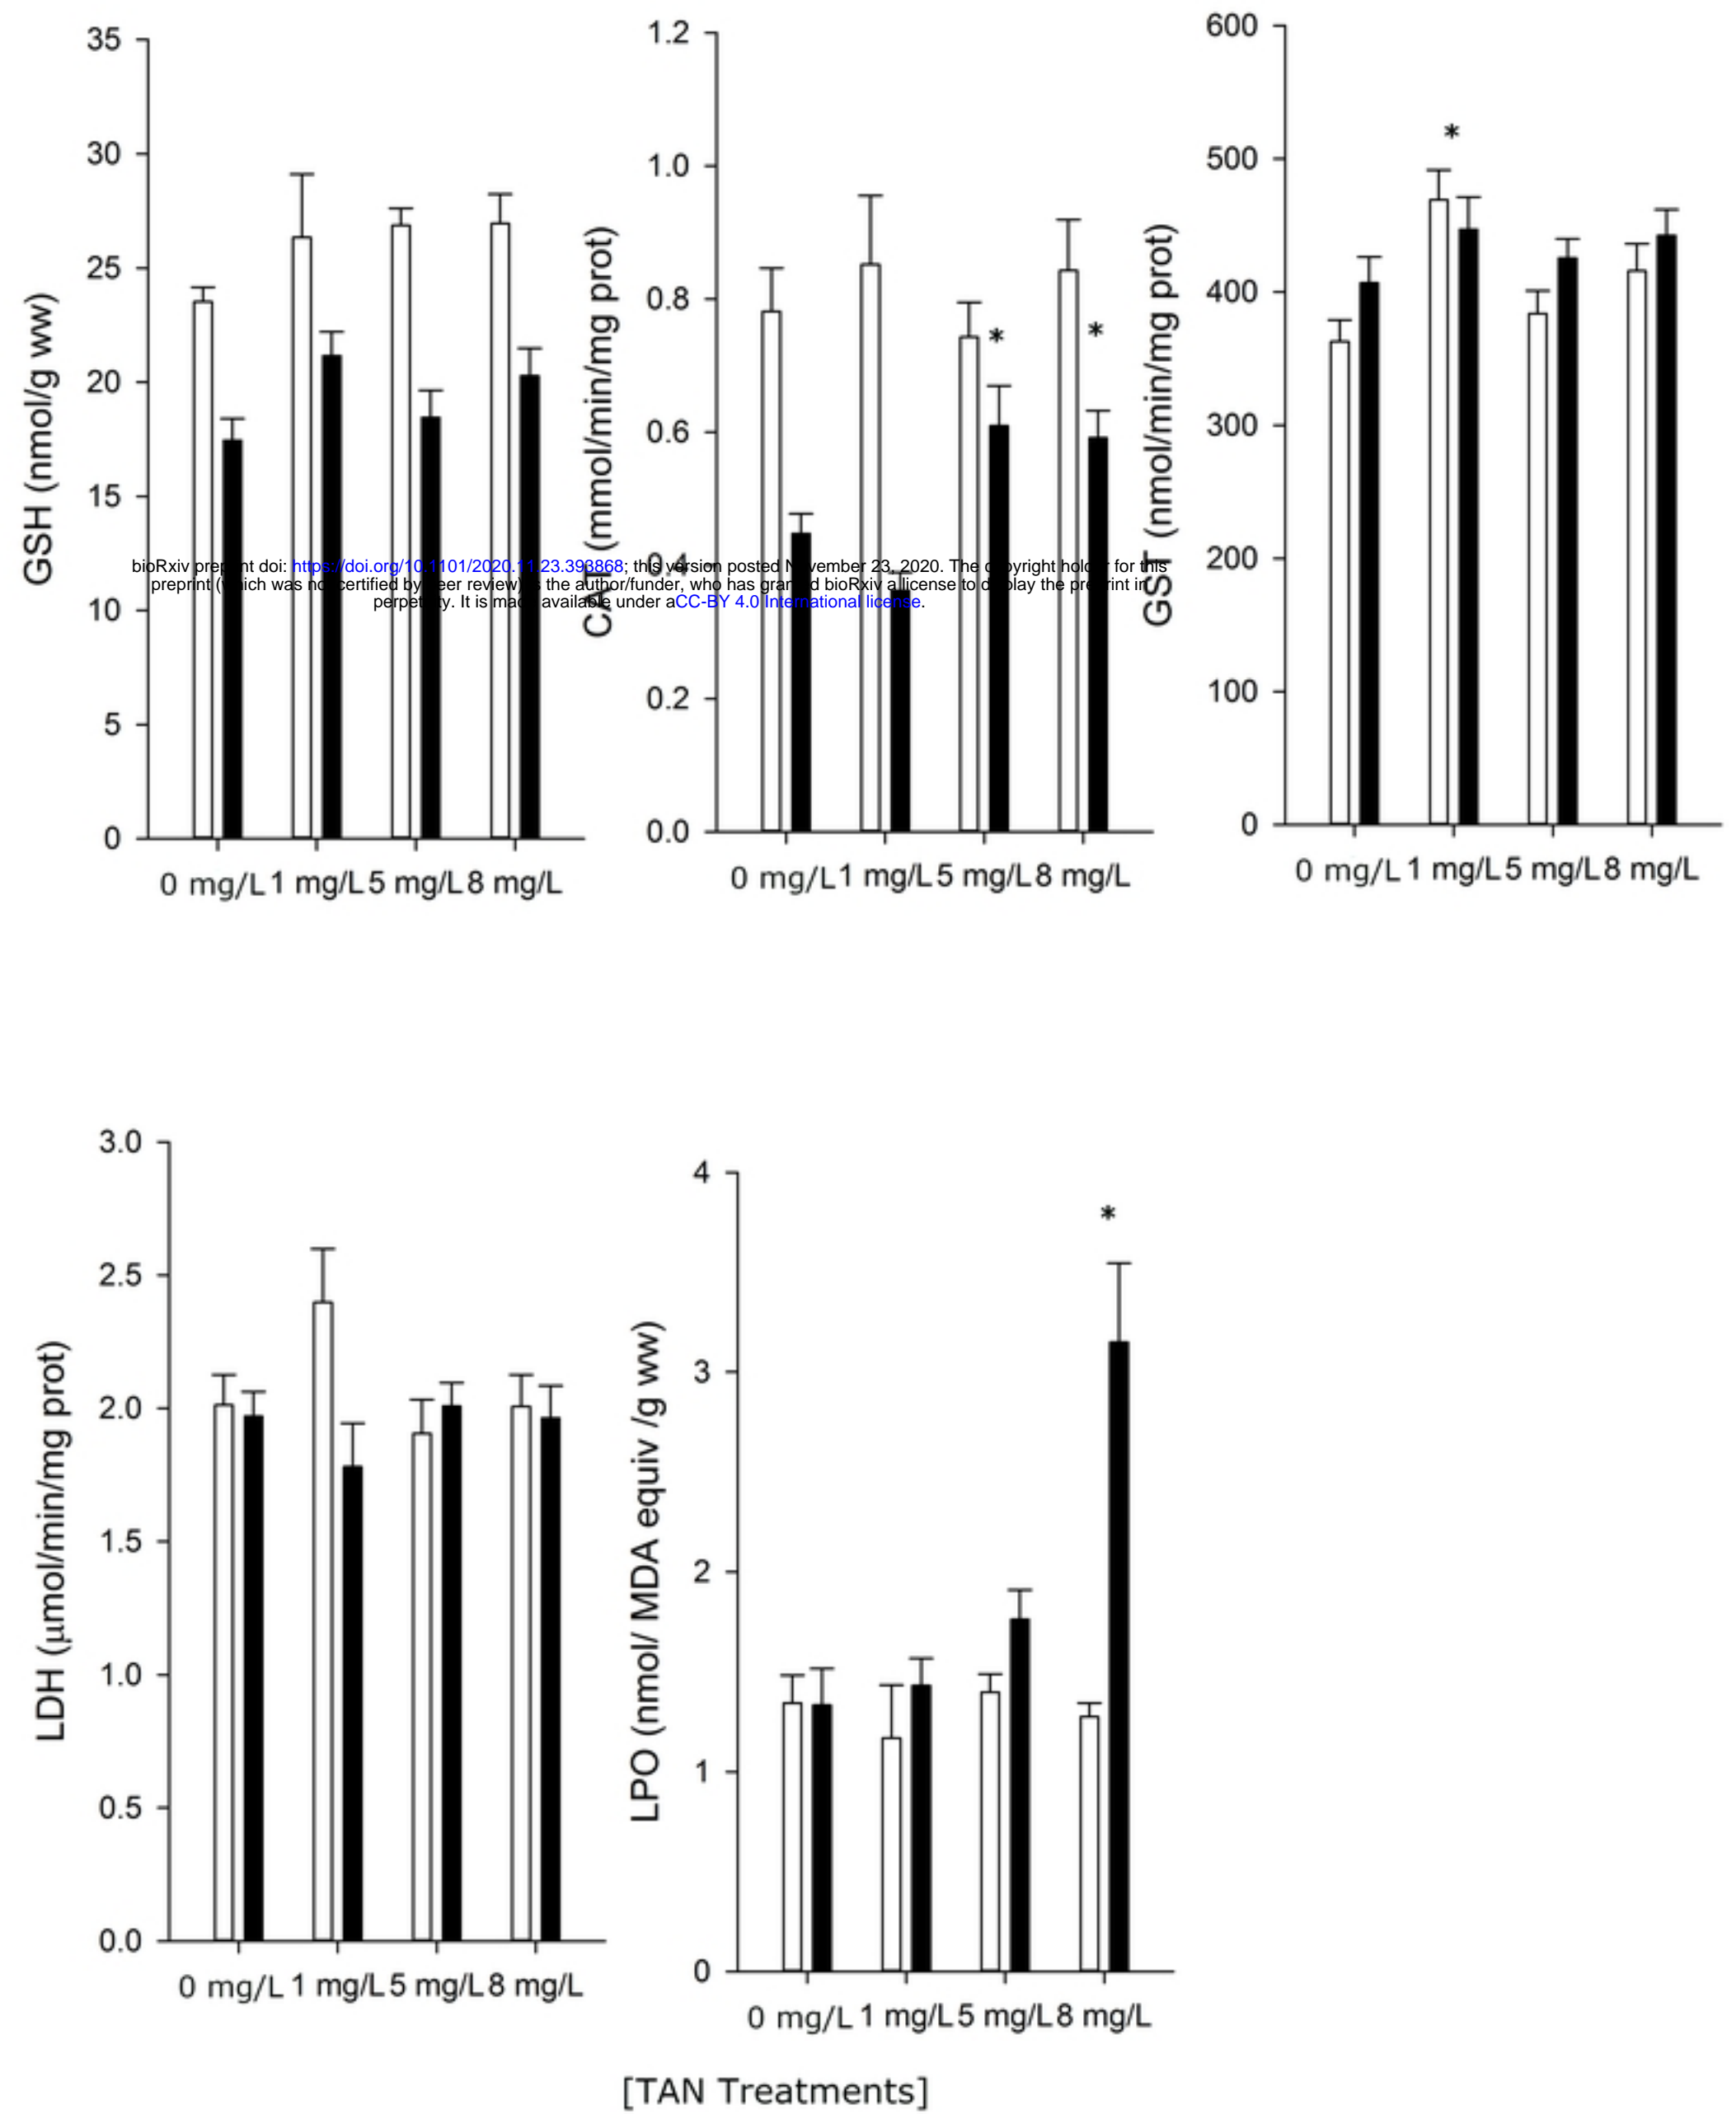

Figure 4
